# Supplementary material for: Toward an Efficient Method of Identifying Core Genes for Evolutionary and Functional Microbial Phylogenies
Source: PLoS One. 2011 Sep 12;6(9):e24704. doi: 10.1371/journal.pone.0024704 (PMC3171473; doi:10.1371/journal.pone.0024704)
Supplement: Table S1 — Average functional and sequence distances between four minimal genera. The reported values are computed on the corresponding normalized phylogenetic trees, averaging the distances of pairs of organisms spanning different genera (off-diagonal) or within the same genus (diagonal). (XLSX) [file pone.0024704.s004.xlsx]

## Sheet: Table S1
	Average functional and sequence distances between four minimal genera.
	The reported values are computed on the corresponding normalized phylogenetic trees, averaging the distances
	of pairs of organisms spanning different genera (off-diagonal) or within the same genus (diagonal).
		16S rRNA phylogenetic distances
		Borrelia		Mycoplasma		Chlamydia		Buchnera
		avg	std	avg	std	avg	std	avg	std
	Borrelia	2.28	2.71	19.06	2.39	15.95	2.22	20.73	2.24
	Mycoplasma	19.06	2.39	5.92	1.92	17.36	0.9	22.14	0.95
	Chlamydia	15.95	2.22	17.36	0.9	0.14	0.1	17.16	0.3
	Buchnera	20.73	2.24	22.14	0.95	17.16	0.3	1.06	0.54
		COGs functional distances
		Borrelia		Mycoplasma		Chlamydia		Buchnera
		avg	std	avg	std	avg	std	avg	std
	Borrelia	0.1	0.04	1.85	0.16	1.34	0.01	2.05	0.02
	Mycoplasma	1.85	0.16	0.67	0.22	1.94	0.16	2.64	0.16
	Chlamydia	1.34	0.01	1.94	0.16	0.04	0.02	1.47	0.02
	Buchnera	2.05	0.02	2.64	0.16	1.47	0.02	0.1	0.06
